# Supplementary material for: Cu2O nanoparticle-catalyzed tandem reactions for the synthesis of robust polybenzoxazole
Source: Royal Society of Chemistry journal article supplement (doi:10.1039/d2nr00492e), 2022-01-01
Supplement: d2nr00492e1.pdf [file d2nr00492e1.pdf]

# Cu<sub>2</sub>O Nanoparticle-Catalyzed Tandem Reactions for the Synthesis of Robust Polybenzoxazole

*Huanqin Guan, Mengqi Shen, Cooro Harris, Honghong Lin, Kecheng Wei, Michael Morales,  
Noah Bronowich and Shouheng Sun\**

Department of Chemistry, Brown University, Providence, RI, 02912 (USA)

E-mail: [ssun@brown.edu](mailto:ssun@brown.edu)

## SUPPLEMENTARY FIGURES

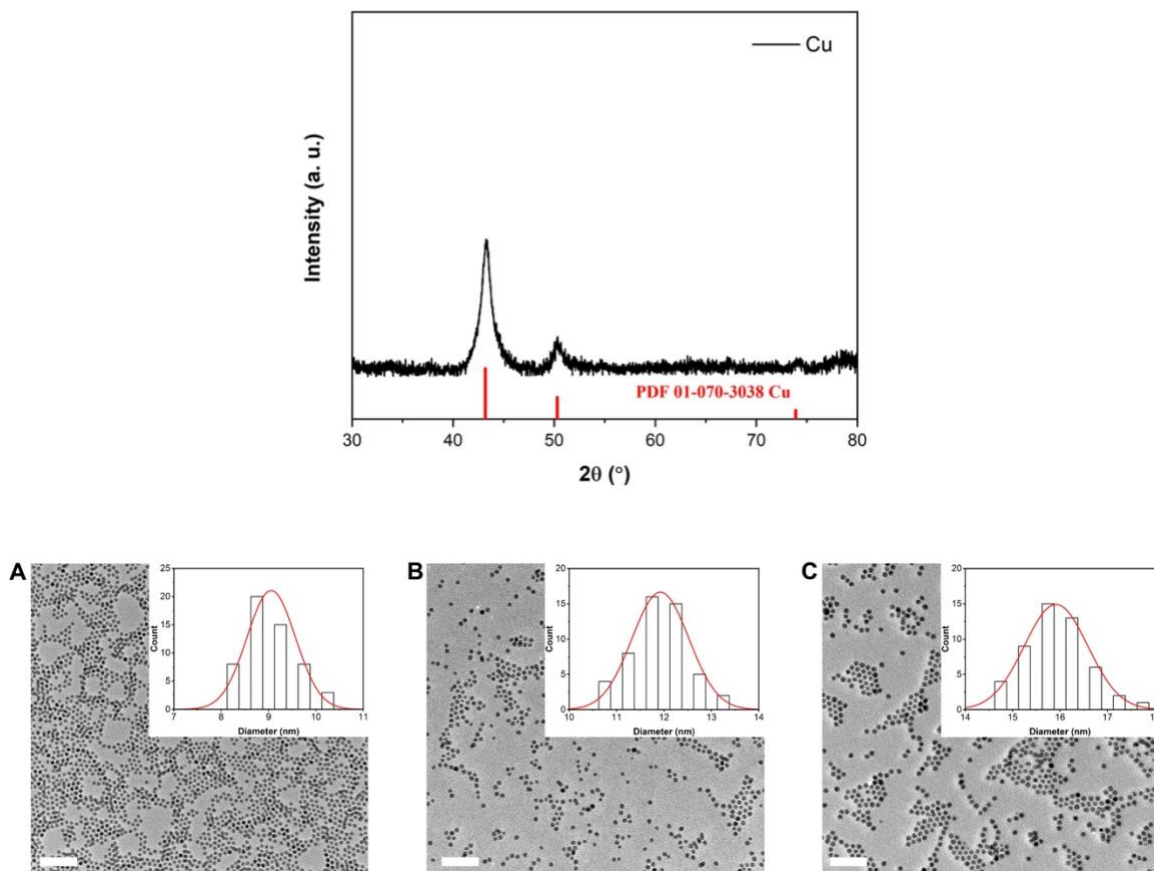

**Figure S1.** (Top) XRD patterns of 7 nm Cu NPs with standard PDF card (01-070-3038).

(Bottom) TEM images and size distribution curves of (A) 9 nm ( $9.1 \pm 0.5$ ) Cu NPs, (B) 12 nm ( $11.9 \pm 0.6$ ) Cu NPs, and (C) 16 nm ( $15.9 \pm 0.7$ ) Cu NPs. Scale bar: 100 nm.

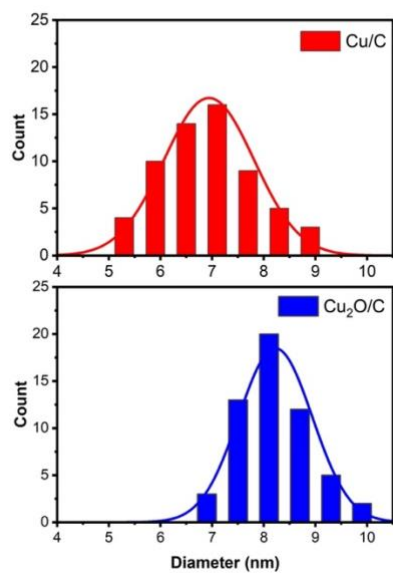

**Figure S2.** Particle size distribution of Cu and Cu<sub>2</sub>O NPs.

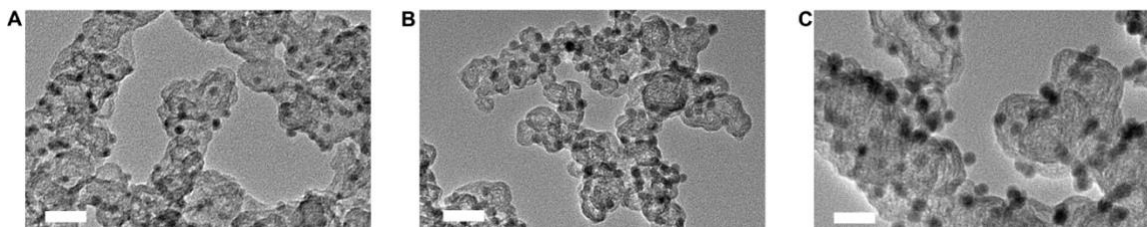

**Figure S3.** TEM images of various Cu<sub>2</sub>O NPs. (A) 10 nm Cu<sub>2</sub>O, (B) 13 nm Cu<sub>2</sub>O, (C) 18 nm Cu<sub>2</sub>O NPs. Scale bar: 50 nm.

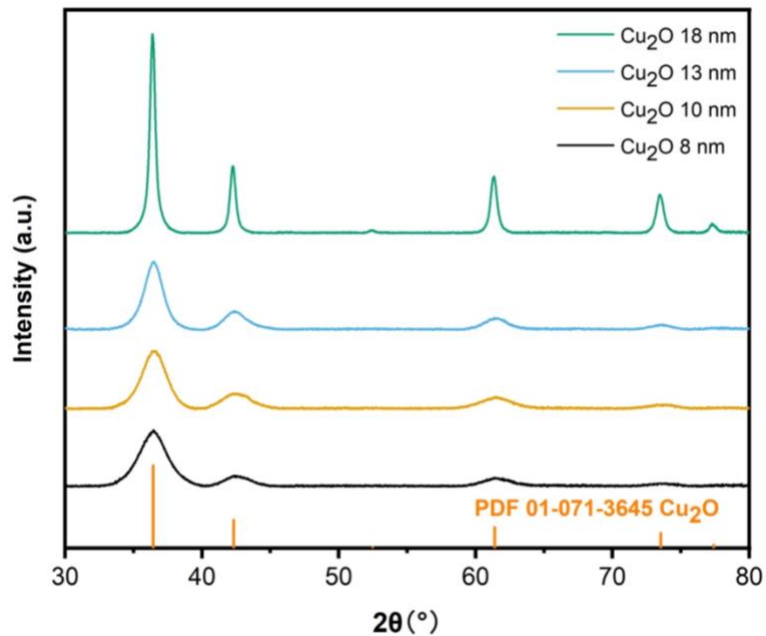

**Figure S4.** XRD patterns of various Cu<sub>2</sub>O NPs and Cu<sub>2</sub>O standard PDF card (01-071-3645).

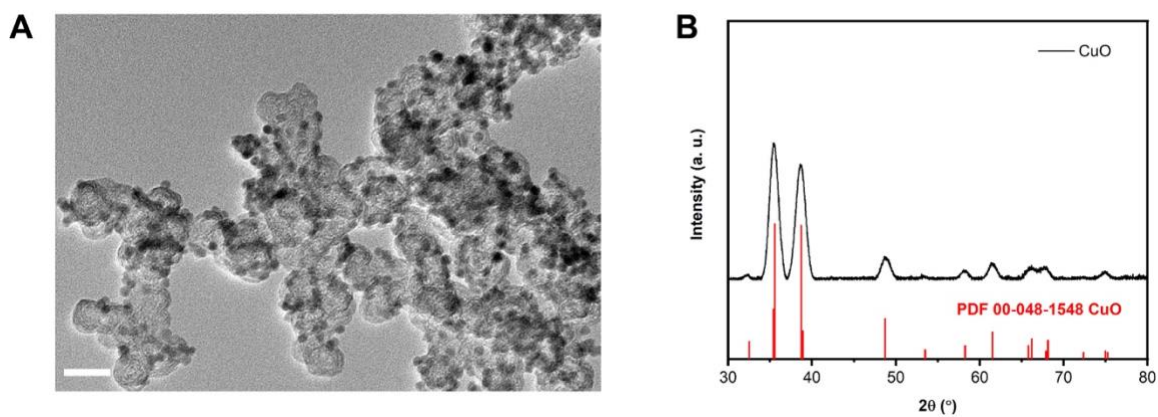

**Figure S5.** (A) TEM image and (B) XRD pattern of CuO NPs. Scale bar 50 nm. Standard PDF card (00-048-1548).

**Table S1.** TOF values normalized to the overall metal content for non-noble metal-based catalysts in AB dehydrogenation reaction.

| <b>Catalyst</b>                                  | <b>TOF (mol H<sub>2</sub> mol catalyst<sup>-1</sup> min<sup>-1</sup>)</b> | <b>Reference</b> |
|--------------------------------------------------|---------------------------------------------------------------------------|------------------|
| Cu <sub>2</sub> O/C                              | 10.0                                                                      | This study       |
| Cu/WO <sub>2.72</sub>                            | 3.75                                                                      | 1                |
| Cu <sub>2</sub> O                                | 0.2                                                                       | 2                |
| Cu <sub>2</sub> O/Co <sub>3</sub> O <sub>4</sub> | 2.63                                                                      | 3                |
| Cu/rGO                                           | 3.61                                                                      | 4                |
| CuCo/graphene                                    | 9.81                                                                      | 5                |
| 3.2 nm Ni/C                                      | 8.8                                                                       | 6                |
| PVP stabilized Ni                                | 4.5                                                                       | 7                |
| Co@N-C-700                                       | 5.6                                                                       | 8                |
| CoNi/graphene                                    | 16.4                                                                      | 9                |

**Table S2.** Reaction condition screening for tandem nitro hydrogenation reaction (yield was normalized to the original 1,5-diisopropoxy-2,4-dinitrobenzene amount).

| Entry    | AB (mmol) | Catalyst (mol%) | Temp. (°C) | Time (h) | Yield (%)     |
|----------|-----------|-----------------|------------|----------|---------------|
| 1        | 6         | 1               | 20         | 2        | 67            |
| 2        | 6         | 1               | 20         | 4        | 91            |
| <b>3</b> | <b>6</b>  | <b>1</b>        | <b>20</b>  | <b>6</b> | <b>&gt;99</b> |
| 4        | 6         | 1               | 20         | 8        | >99           |
| 5        | 4         | 1               | 20         | 6        | 62            |
| 6        | 8         | 1               | 20         | 6        | >99           |
| 7        | 6         | 0.5             | 20         | 12       | 73            |
| 8        | 6         | 0.1             | 20         | 12       | 51            |

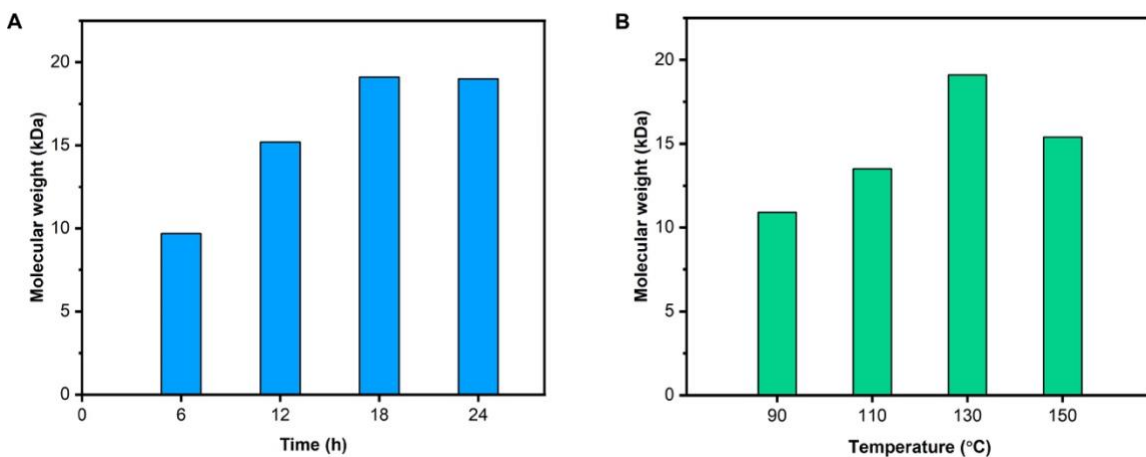

**Figure S6.** Cu<sub>2</sub>O/C catalyzed pre-PBO formation. (A) time-dependent and (B) temperature-dependent polymerization.

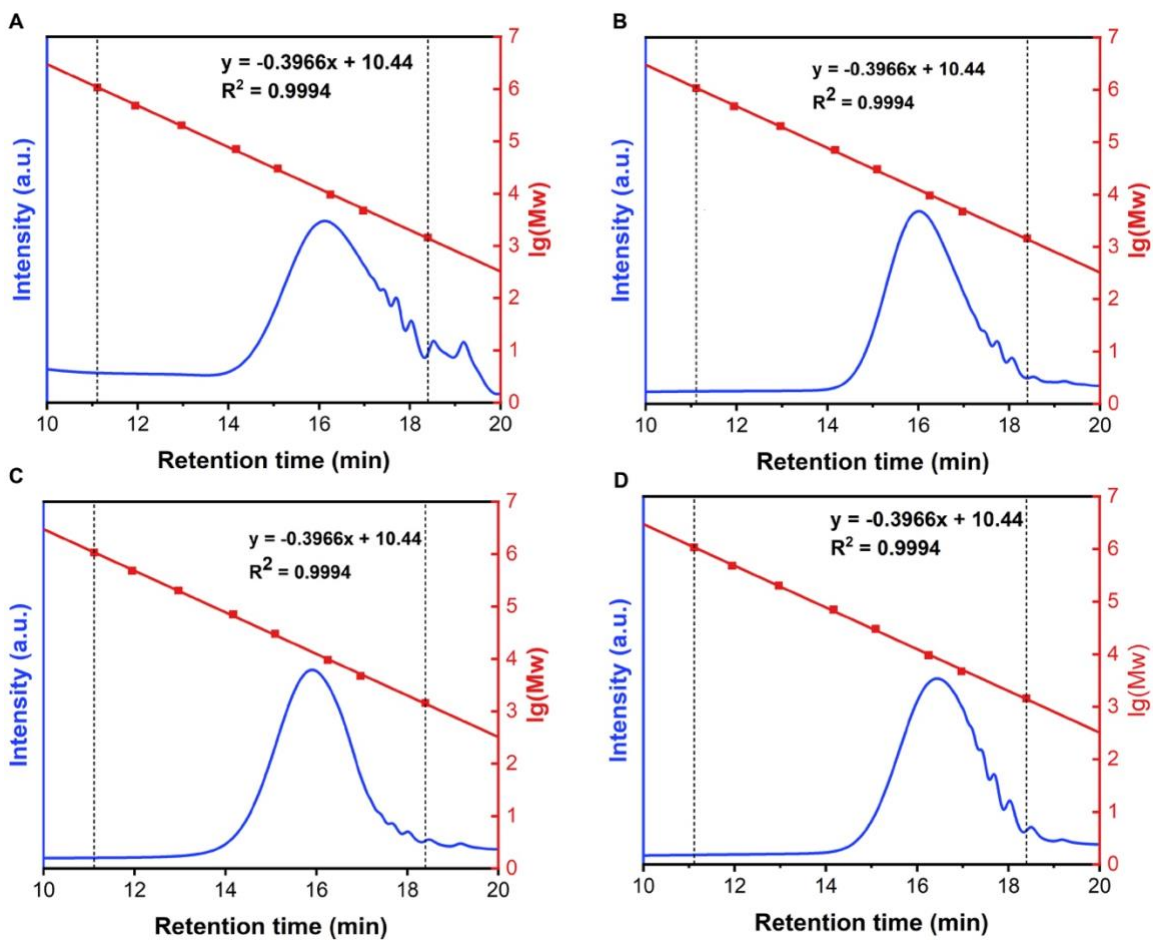

**Figure S7.** GPC of pre-PBO (blue) (and calibration curve (red)) made from tandem reactions catalyzed by different Cu<sub>2</sub>O/C NPs of (A) 8 nm, (B) 10 nm, (C) 13 nm, and (D) 18 nm.

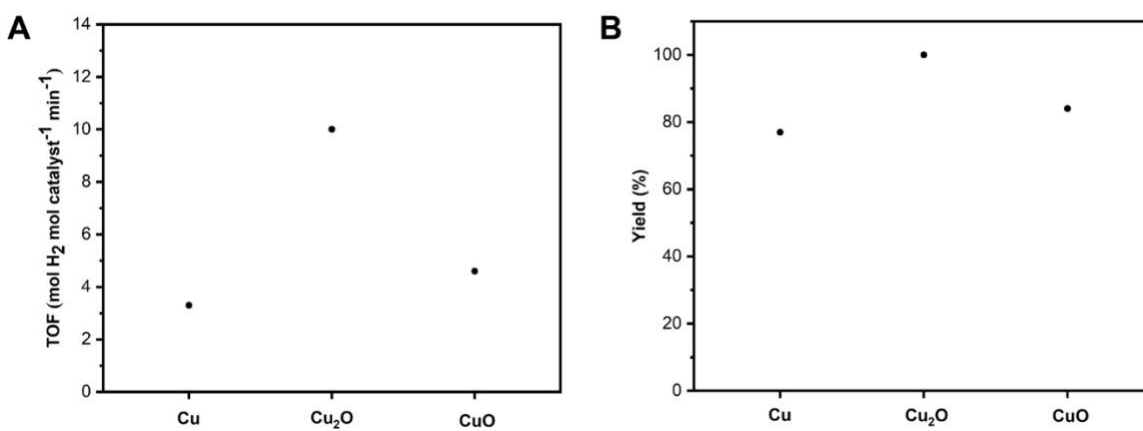

**Figure S8.** (A) TOF values of NP-catalyzed AB dehydrogenation reaction, and (B) yields of the amine product obtained from nitro-hydrogenation in the presence of different NP catalysts.

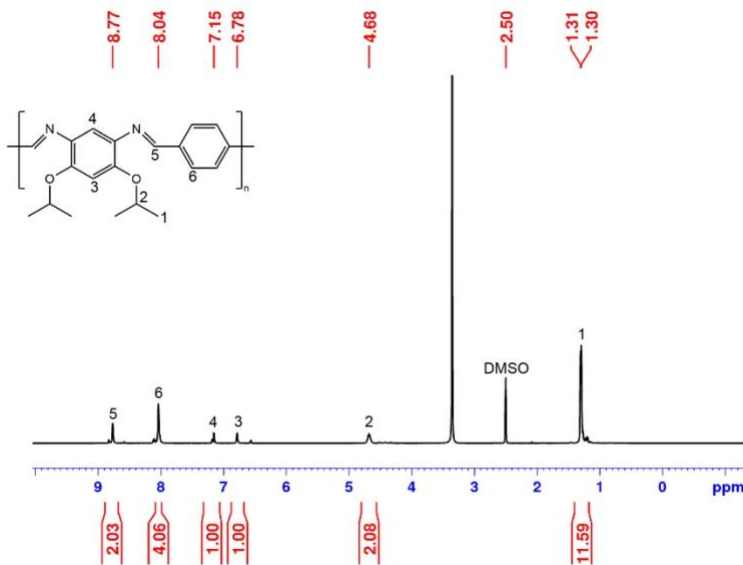

**Figure S9.** <sup>1</sup>H NMR of pre-PBO. Inset: assignment of the proton signals in the pre-PBO chemical structure (400 MHz, d<sub>6</sub>-dimethyl sulfoxide).

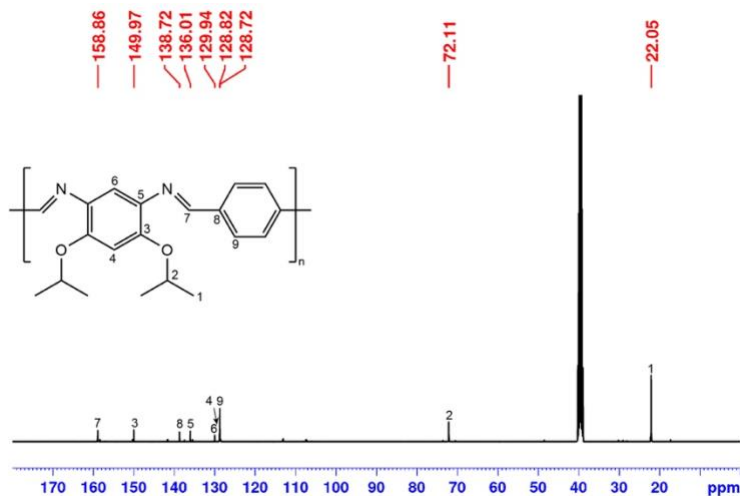

**Figure S10.** <sup>13</sup>C NMR of pre-PBO. Inset: assignment of the carbon signals in the pre-PBO chemical structure (101 MHz, d<sub>6</sub>-dimethyl sulfoxide).



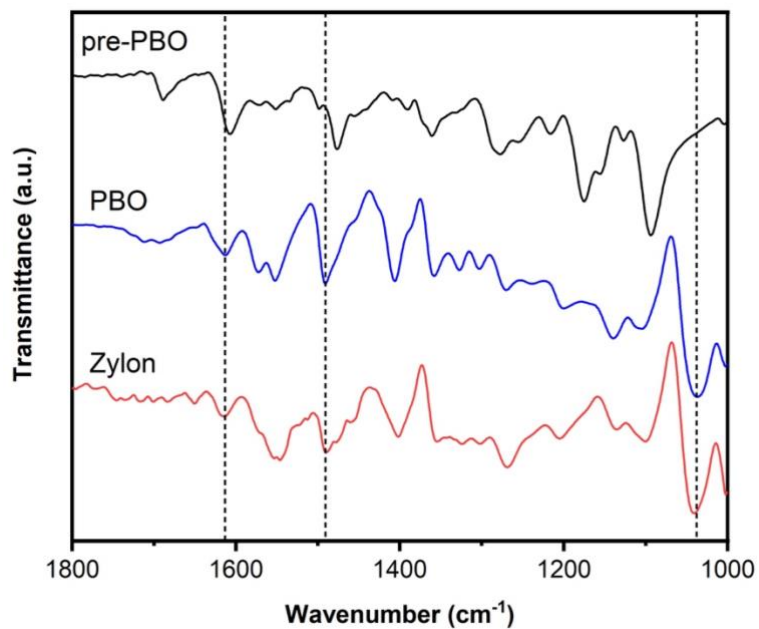

**Figure S11.** ATR-FTIR spectra of pre-PBO, PBO and Zylon with the assignment of benzoxazole ring (dashed lines).

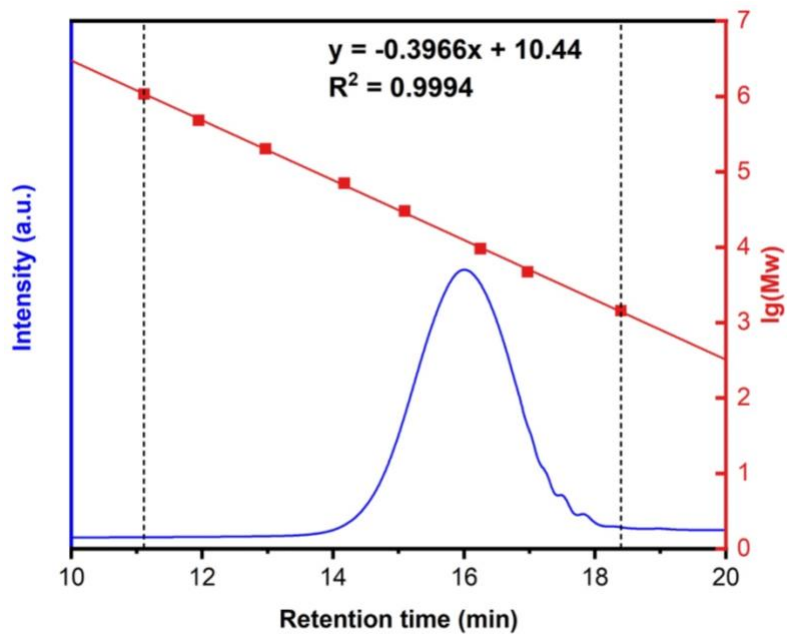

**Figure S12.** GPC of pre-PBO synthesized by one pot method.

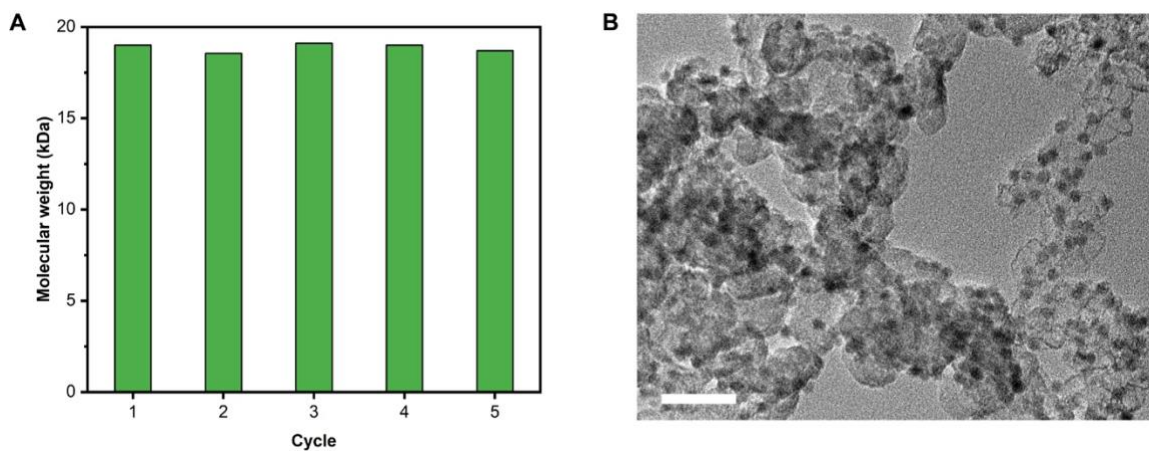

**Figure S13.** Recyclability tests of Cu<sub>2</sub>O/C catalysts. (A) The polymerization degree (in the form of  $M_w$ ) of pre-PBO obtained from each of the 5 reaction cycles. (B) TEM image of the Cu<sub>2</sub>O/C catalyst after 5 reaction cycles. Scale bar: 50 nm.

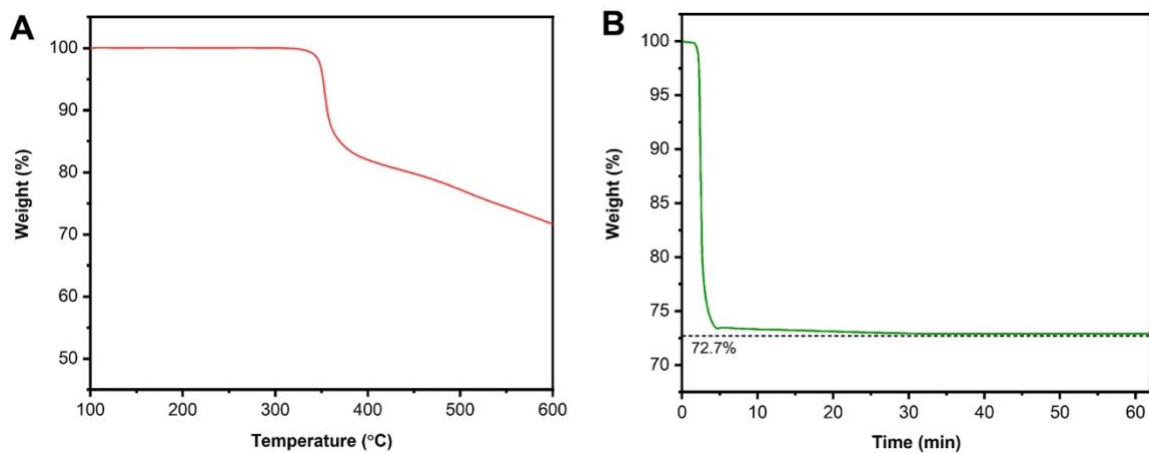

**Figure S14.** (A) Dynamic TGA curve of pre-PBO and (B) static TGA curve of pre-PBO at 350 °C.

**Table S3.** Mechanical properties of as-prepared PBO, Zylon and PBO from previous work.<sup>10</sup>

| Sample                      | Initial tensile stress (MPa) | Final tensile stress after boiling water treatment (MPa) | Final tensile stress after boiling simulated seawater treatment (MPa) |
|-----------------------------|------------------------------|----------------------------------------------------------|-----------------------------------------------------------------------|
| As-prepared PBO (19 kDa)    | 55.2                         | 52.4                                                     | 49.2                                                                  |
| Commercial Zylon (40 kDa)   | 60.2                         | 42.7                                                     | 32.7                                                                  |
| PBO from AuPd work (11 kDa) | 50.2                         | 42.5                                                     | /                                                                     |

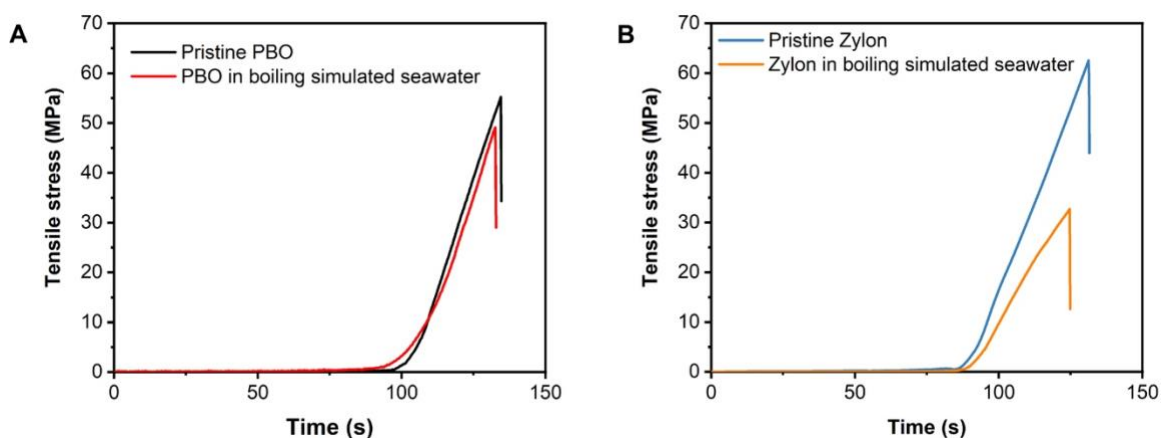

**Figure S15.** Stability of PBO mechanical properties. The stress-strain curve for (A) as-prepared PBO and (B) commercial Zylon films.

## REFERENCE

1. M. Shen, H. Liu, C. Yu, Z. Yin, M. Muzzio, J. Li, Z. Xi, Y. Yu and S. Sun, *J. Am. Chem. Soc.* 2018, **140**, 16460-16463.

2. S. B. Kalidindi, U. Sanyal and B. R. Jagirdar, *Phys. Chem. Chem. Phys.* 2008, **10**, 5870-5874.
3. Y. Yamada, K. Yano, Q. Xu and S. Fukuzumi, *J. Phys. Chem. C* 2010, **114**, 16456-16462.
4. Y. Yang, Z.-H. Lu, Y. Hu, Z. Zhang, W. Shi, X. Chen and T. Wang, *RSC Adv.* 2014, **4**, 13749-13752.
5. J.-M. Yan, Z.-L. Wang, H.-L. Wang and Q. Jiang, *J. Mater. Chem.* 2012, **22**, 10990-10993.
6. Ö. Metin, V. Mazumder, S. Özkar and S. Sun, *J. Am. Chem. Soc.* 2010, **132**, 1468-1469.
7. T. Umegaki, J.-M. Yan, X.-B. Zhang, H. Shioyama, N. Kuriyama and Q. Xu, *Int. J. Hydrogen Energy* 2009, **34**, 3816-3822.
8. H. Wang, Y. Zhao, F. Cheng, Z. Tao and J. Chen, *Catal. Sci. Technol.* 2016, **6**, 3443-3448.
9. W. Feng, L. Yang, N. Cao, C. Du, H. Dai, W. Luo and G. Cheng, *Int. J. Hydrogen Energy* 2014, **39**, 3371-3380.
10. M. Shen, C. Yu, H. Guan, X. Dong, C. Harris, Z. Xiao, Z. Yin, M. Muzzio, H. Lin, J. R. Robinson, V. L. Colvin and S. Sun, *J. Am. Chem. Soc.* 2021, **143**, 2115-2122.
